# Supplementary material for: Local Packing Density Is the Main Structural Determinant of the Rate of Protein Sequence Evolution at Site Level
Source: Hindawi journal article supplement (doi:10.1155/2014/572409), 2014-01-01
Supplement: f1 [file 572409.f1.pdf]

**TABLE S1**  
**A list of the 216 proteins**

| <b>PDB</b> | <b>EC Class</b> | <b>SCOP</b> | <b>Chain</b> | <b>Nsites<sup>1</sup></b> | <b>Year</b> | <b>Resolution (Å)</b> | <b>R.value</b> | <b>Nseq<sup>2</sup></b> |
|------------|-----------------|-------------|--------------|---------------------------|-------------|-----------------------|----------------|-------------------------|
| 132L       | 3.02.01.0017    | a+b         | A            | 124                       | 1993        | 1.8                   | 0.173          | 300                     |
| 13PK       | 2.07.02.0003    | a/b         | A            | 415                       | 1996        | 2.5                   | 0.221          | 300                     |
| 1A26       | 2.04.02.0030    | a, a+b      | A            | 351                       | 1998        | 2.25                  | 0.168          | 300                     |
| 1A2T       | 3.01.31.0001    | b           | A            | 134                       | 1998        | 1.96                  | 0.169          | 300                     |
| 1A4L       | 5.99.01.0002    | a/b         | A            | 349                       | 1998        | 2.6                   | 0.185          | 300                     |
| 1A65       | 1.10.03.0002    | b, b, b     | A            | 504                       | 1998        | 2.23                  | 0.16           | 300                     |
| 1A8H       | 6.01.01.0010    | a, a/b      | A            | 500                       | 1998        | 2                     | 0.205          | 300                     |
| 1A8S       | 1.11.01.0010    | a/b         | A            | 273                       | 1998        | 1.8                   | 0.173          | 300                     |
| 1AF7       | 2.01.01.0080    | a, a/b      | A            | 274                       | 1997        | 2                     | 0.2            | 300                     |
| 1AGM       | 3.02.01.0003    | a           | A            | 470                       | 1994        | 2.3                   | 0.124          | 300                     |
| 1AGY       | 3.01.01.0000    | a/b         | A            | 197                       | 1997        | 1.15                  | 0.175          | 300                     |
| 1AH7       | 3.01.04.0003    | a           | A            | 245                       | 1997        | 1.5                   | 0.203          | 83                      |
| 1AJ0       | 2.05.01.0015    | a/b         | A            | 282                       | 1997        | 2                     | 0.206          | 300                     |
| 1AK0       | 3.01.30.0001    | a           | A            | 264                       | 1997        | 1.8                   | 0.207          | 300                     |
| 1AKO       | 3.01.11.0002    | a+b         | A            | 268                       | 1997        | 1.7                   | 0.169          | 300                     |
| 1AMY       | 3.02.01.0001    | b, a/b      | A            | 403                       | 1994        | 2.8                   | 0.153          | 300                     |
| 1AQ2       | 4.01.01.0049    | a/b, a/b    | A            | 534                       | 1997        | 1.9                   | 0.218          | 300                     |
| 1AQL       | 3.01.01.0013    | a/b         | A            | 532                       | 1997        | 2.8                   | 0.211          | 300                     |
| 1AST       | 3.04.24.0021    | a+b         | A            | 200                       | 1993        | 1.8                   | 0.158          | 300                     |
| 1B04       | 6.05.01.0002    | a+b         | A            | 310                       | 1998        | 2.8                   | 0.23           | 300                     |
| 1B2R       | 1.18.01.0002    | b, a/b      | A            | 295                       | 1998        | 1.8                   | 0.19           | 300                     |
| 1BBS       | 3.04.23.0015    | b           | A            | 325                       | 1992        | 2.8                   | 0.196          | 300                     |
| 1BF2       | 3.02.01.0068    | b, b, a/b   | A            | 750                       | 1998        | 2                     | 0.161          | 300                     |
| 1BG0       | 2.07.03.0003    | a, a+b      | A            | 356                       | 1998        | 1.86                  | 0.196          | 300                     |
| 1BH2       | na              | a, a/b      | A            | 315                       | 1998        | 2.1                   | 0.19           | 300                     |
| 1BOL       | 2.07.01.0068    | a+b         | A            | 222                       | 1998        | 2                     | 0.185          | 300                     |
| 1BP2       | 3.01.01.0004    | a           | A            | 123                       | 1981        | 1.7                   | 0.171          | 300                     |
| 1BQC       | 3.02.01.0078    | a/b         | A            | 302                       | 1998        | 1.5                   | 0.119          | 300                     |
| 1BS0       | 2.03.01.0047    | a/b         | A            | 383                       | 1998        | 1.65                  | 0.178          | 300                     |
| 1BS4       | 3.05.01.0088    | a+b         | A            | 168                       | 1998        | 1.9                   | 0.193          | 300                     |
| 1BS9       | 3.01.01.0006    | a/b         | A            | 207                       | 1998        | 1.1                   | 0.123          | 300                     |
| 1BT1       | 1.10.03.0001    | a           | A            | 336                       | 1998        | 2.7                   | 0.168          | 300                     |
| 1BU7       | 1.06.02.0004    | a           | A            | 455                       | 1998        | 1.65                  | 0.197          | 300                     |
| 1BVV       | 3.02.01.0008    | b           | A            | 185                       | 1998        | 1.8                   | 0.189          | 300                     |
| 1BVZ       | 3.02.01.0135    | b, b, a/b   | A            | 585                       | 1998        | 2.6                   | 0.196          | 300                     |
| 1BWL       | 1.06.99.0001    | a/b         | A            | 399                       | 1998        | 2.7                   | 0.19           | 300                     |
| 1BWZ       | 5.01.01.0007    | a+b, a+b    | A            | 274                       | 1998        | 2.72                  | 0.19           | 300                     |
| 1BYA       | 3.02.01.0002    | a/b         | A            | 491                       | 1994        | 2.2                   | 0.169          | 137                     |
| 1BZC       | 3.01.03.0048    | a/b         | A            | 297                       | 1998        | 2.35                  | 0.204          | 300                     |
| 1C82       | 4.02.02.0001    | a, b, b     | A            | 719                       | 2000        | 1.7                   | 0.215          | 244                     |
| 1CA2       | 4.02.01.0001    | b           | A            | 256                       | 1989        | 2                     | 0.173          | 300                     |
| 1CB8       | 4.02.02.0005    | a, b, b     | A            | 674                       | 1999        | 1.9                   | 0.195          | 240                     |
| 1CBX       | 3.04.17.0001    | a/b         | A            | 307                       | 1991        | 2                     | 0.166          | 300                     |

|      |              |                    |   |     |      |      |        |     |
|------|--------------|--------------------|---|-----|------|------|--------|-----|
| 1CDG | 2.04.01.0019 | b, b, b, a/b       | A | 686 | 1993 | 2    | 0.164  | 300 |
| 1CEL | 3.02.01.0091 | b                  | A | 433 | 1994 | 1.8  | 0.181  | 239 |
| 1CHD | 3.01.01.0061 | a/b                | A | 198 | 1995 | 1.75 | 0.182  | 300 |
| 1CHK | 3.02.01.0132 | a+b                | B | 238 | 1995 | 2.4  | 0.181  | 73  |
| 1CM0 | 2.03.01.0048 | a+b                | A | 162 | 1999 | 2.3  | 0.223  | 300 |
| 1CNS | 3.04.23.0004 | a+b                | A | 243 | 1995 | 1.91 | 0.186  | 300 |
| 1COY | 1.01.03.0006 | a/b, a+b           | A | 501 | 1993 | 1.8  | 0.159  | 300 |
| 1CQQ | 2.07.07.0048 | b                  | A | 180 | 1999 | 1.85 | 0.218  | 194 |
| 1CVR | 3.04.22.0037 | b, a/b             | A | 432 | 1999 | 2    | 0.163  | 134 |
| 1CWY | 2.04.01.0025 | a/b                | A | 500 | 1999 | 2    | 0.19   | 300 |
| 1CZ1 | 3.02.01.0058 | a/b                | A | 394 | 1999 | 1.85 | 0.166  | 300 |
| 1CZF | 3.02.01.0015 | b                  | A | 335 | 1999 | 1.68 | 0.166  | 300 |
| 1D1Q | 3.01.03.0002 | a/b                | A | 159 | 1999 | 1.7  | 0.17   | 300 |
| 1D4C | 1.03.99.0001 | a, a/b, a+b        | A | 570 | 1999 | 2.9  | 0.21   | 300 |
| 1D6O | 5.02.01.0008 | a+b                | A | 107 | 1999 | 1.85 | 0.192  | 300 |
| 1DDJ | 3.04.21.0007 | b                  | A | 247 | 1999 | 2    | 0.194  | 300 |
| 1DGK | 2.07.01.0001 | a/b, a/b, a/b, a/b | N | 898 | 1999 | 2.8  | 0.258  | 60  |
| 1DGS | 6.05.01.0002 | a, b, a+b          | A | 581 | 1999 | 2.9  | 0.228  | 300 |
| 1DIN | 3.01.01.0045 | a/b                | A | 233 | 1996 | 1.8  | 0.15   | 300 |
| 1DNP | 4.01.99.0003 | a, a/b             | A | 469 | 1995 | 2.3  | 0.172  | 300 |
| 1DVE | 1.14.99.0003 | a                  | A | 214 | 2000 | 2.4  | 0.214  | 300 |
| 1E0C | 2.08.01.0001 | a/b, a/b           | A | 270 | 2000 | 1.8  | 0.18   | 300 |
| 1E1A | 3.01.08.0002 | b                  | A | 312 | 2000 | 1.8  | 0.1763 | 300 |
| 1E6E | 1.18.01.0002 | a/b, a/b           | A | 457 | 2000 | 2.3  | 0.222  | 300 |
| 1EB6 | 3.04.24.0039 | a+b                | A | 177 | 2001 | 1    | 0.104  | 225 |
| 1EH5 | 3.01.02.0022 | a/b                | A | 279 | 2000 | 2.5  | 0.226  | 300 |
| 1EUG | 3.02.02.0003 | a/b                | A | 225 | 1998 | 1.6  | 0.194  | 300 |
| 1EUU | 3.02.01.0018 | b, b, b            | A | 601 | 1996 | 2.5  | 0.228  | 300 |
| 1EX1 | 3.02.01.0058 | a/b, a/b           | A | 602 | 1998 | 2.2  | 0.17   | 300 |
| 1EXN | 3.01.11.0003 | a, a/b             | A | 267 | 1997 | 2.5  | 0.227  | 300 |
| 1EXP | 3.02.01.0008 | a/b                | A | 312 | 1996 | 1.8  | 0.208  | 300 |
| 1EYP | 5.05.01.0006 | a+b                | A | 212 | 2000 | 2.5  | 0.249  | 272 |
| 1FF3 | 1.08.04.0006 | a+b                | A | 210 | 2000 | 1.9  | 0.195  | 300 |
| 1FGH | 4.02.01.0003 | a/b, a/b           | A | 753 | 1996 | 2.05 | 0.177  | 300 |
| 1FHL | 3.02.01.0089 | a/b                | A | 334 | 2000 | 2.3  | 0.166  | 300 |
| 1FOA | 2.04.01.0101 | a/b                | A | 342 | 2000 | 1.8  | 0.185  | 200 |
| 1G24 | 2.04.02.0000 | a+b                | A | 211 | 2000 | 1.7  | 0.24   | 241 |
| 1G6T | 2.05.01.0019 | a+b                | A | 427 | 2000 | 1.6  | 0.155  | 300 |
| 1G8O | 2.04.01.0087 | a/b                | A | 287 | 2000 | 2.3  | 0.274  | 98  |
| 1GA8 | 2.04.01.0044 | a/b                | A | 271 | 2000 | 2    | 0.189  | 300 |
| 1GAL | 1.01.03.0004 | a/b, a+b           | A | 581 | 1992 | 2.3  | 0.181  | 300 |
| 1GCU | 1.03.01.0024 | a/b, a+b           | A | 292 | 2000 | 1.4  | 0.219  | 300 |
| 1GOG | 1.01.03.0009 | b, b, b            | A | 639 | 1993 | 1.9  | 0.17   | 300 |
| 1GP5 | 1.14.11.0019 | b                  | A | 346 | 2001 | 2.2  | 0.204  | 300 |
| 1GQ8 | 3.01.01.0011 | b                  | A | 318 | 2001 | 1.75 | 0.181  | 300 |
| 1H19 | 3.03.02.0006 | a, b, a+b          | A | 610 | 2002 | 2.1  | 0.184  | 300 |

|      |              |                                    |   |      |      |      |       |     |
|------|--------------|------------------------------------|---|------|------|------|-------|-----|
| 1H3I | 2.01.01.0043 | b, b                               | A | 293  | 2002 | 2.1  | 0.21  | 300 |
| 1HKA | 2.07.06.0003 | a+b                                | A | 158  | 1998 | 1.5  | 0.182 | 300 |
| 1HPL | 3.01.01.0003 | b, a/b                             | A | 448  | 1993 | 2.3  | 0.159 | 300 |
| 1HPM | 3.06.01.0003 | a/b, a/b                           | A | 378  | 1995 | 1.7  | 0.205 | 300 |
| 1HQC | 3.06.01.0003 | a, a/b                             | A | 314  | 2000 | 3.2  | 0.263 | 300 |
| 1IIE | 3.04.24.0069 | b, b, a+b, Coiled<br>coil proteins | A | 1287 | 2001 | 2.5  | 0.217 | 32  |
| 1III | 3.04.24.0016 | a+b                                | P | 665  | 2001 | 2.3  | 0.224 | 300 |
| 1I9A | 5.03.03.0002 | a+b                                | A | 175  | 2001 | 2.5  | 0.229 | 300 |
| 1IDJ | 4.02.02.0010 | b                                  | A | 359  | 1996 | 2.4  | 0.16  | 300 |
| 1IG8 | 2.07.01.0001 | a/b, a/b                           | A | 469  | 2001 | 2.2  | 0.162 | 300 |
| 1IM5 | 3.05.01.0019 | a/b                                | A | 179  | 2001 | 1.65 | 0.152 | 300 |
| 1INP | 3.01.03.0057 | multi-domain                       | A | 400  | 1994 | 2.3  | 0.198 | 300 |
| 1IU4 | 2.03.02.0013 | a+b                                | A | 331  | 2002 | 2.4  | 0.199 | 8   |
| 1J00 | 3.01.02.0000 | a/b                                | A | 176  | 2002 | 2    | 0.239 | 300 |
| 1J09 | 6.01.01.0017 | a, a/b                             | A | 468  | 2002 | 1.8  | 0.199 | 300 |
| 1JH6 | 3.01.04.0000 | a+b                                | A | 181  | 2001 | 1.8  | 0.192 | 282 |
| 1JMS | 2.07.07.0031 | a, a, a+b                          | A | 360  | 2001 | 2.36 | 0.214 | 300 |
| 1JOA | 1.11.01.0001 | a/b, a/b, a+b                      | A | 446  | 1996 | 2.8  | 0.179 | 300 |
| 1JS4 | 3.02.01.0004 | a, b                               | A | 605  | 1997 | 2    | 0.199 | 300 |
| 1K30 | 2.03.01.0015 | a/b                                | A | 363  | 2001 | 1.9  | 0.186 | 48  |
| 1KL7 | 4.02.03.0001 | a/b                                | A | 503  | 2001 | 2.7  | 0.201 | 300 |
| 1KNP | 1.04.03.0016 | a, a/b, a+b                        | A | 529  | 2001 | 2.6  | 0.23  | 300 |
| 1L1D | 1.08.04.0006 | b                                  | A | 142  | 2002 | 1.85 | 0.207 | 300 |
| 1L1L | 1.17.04.0002 | a/b                                | A | 717  | 2002 | 1.75 | 0.223 | 300 |
| 1L6P | 1.08.01.0008 | b                                  | A | 121  | 2002 | 1.65 | 0.141 | 300 |
| 1L7N | 3.01.03.0003 | a/b                                | A | 207  | 2002 | 1.8  | 0.191 | 300 |
| 1L7Q | 3.01.01.0001 | b, a/b                             | A | 571  | 2002 | 1.76 | 0.183 | 300 |
| 1L8T | 2.07.01.0095 | a+b                                | A | 263  | 2002 | 2.4  | 0.234 | 300 |
| 1L9X | 3.04.19.0009 | a/b                                | A | 288  | 2002 | 1.6  | 0.181 | 300 |
| 1LBA | 3.05.01.0028 | a+b                                | A | 146  | 1993 | 2.2  | 0.19  | 300 |
| 1LBU | 3.04.17.0008 | a, a+b                             | A | 213  | 1996 | 1.8  | 0.164 | 300 |
| 1LDM | 1.01.01.0027 | a/b, a+b                           | A | 329  | 1987 | 2.1  | 0.173 | 300 |
| 1LJL | 1.03.99.0001 | a/b                                | A | 130  | 2002 | 2.01 | 0.214 | 300 |
| 1LVH | 5.04.02.0006 | a/b                                | A | 220  | 2002 | 2.3  | 0.243 | 300 |
| 1M53 | 5.04.99.0011 | b, a/b                             | A | 556  | 2002 | 2.2  | 0.194 | 300 |
| 1MBB | 1.01.01.0158 | a+b, a+b                           | A | 340  | 1995 | 2.3  | 0.238 | 300 |
| 1MJ9 | 2.03.01.0048 | a+b                                | A | 273  | 2002 | 2.5  | 0.232 | 300 |
| 1MLA | 2.03.01.0039 | a/b, a+b                           | A | 305  | 1995 | 1.5  | 0.184 | 300 |
| 1MRQ | 1.03.01.0020 | a/b                                | A | 323  | 2002 | 1.59 | 0.173 | 300 |
| 1MUD | 3.02.02.0000 | a                                  | A | 225  | 1998 | 1.8  | 0.192 | 300 |
| 1MUG | 3.02.02.0000 | a/b                                | A | 165  | 1998 | 1.8  | 0.198 | 300 |
| 1NDH | 1.06.02.0002 | b, a/b                             | A | 270  | 1994 | 2.1  | 0.223 | 300 |
| 1NDI | 2.03.01.0007 | a/b, a/b                           | A | 596  | 2002 | 2.3  | 0.27  | 300 |
| 1NLU | 3.04.21.0100 | a/b                                | A | 368  | 2003 | 1.3  | 0.164 | 300 |
| 1O8A | 3.04.15.0001 | a+b                                | A | 574  | 2002 | 2    | 0.18  | 300 |

|      |              |                    |   |      |      |      |        |     |
|------|--------------|--------------------|---|------|------|------|--------|-----|
| 1O98 | 5.04.02.0001 | a/b, a/b           | A | 509  | 2002 | 1.4  | 0.19   | 300 |
| 1OBA | 3.02.01.0017 | b, a/b             | A | 338  | 2003 | 2.45 | 0.205  | 300 |
| 1OG1 | 2.04.02.0031 | a+b                | A | 223  | 2003 | 2    | 0.202  | 165 |
| 1OGO | 3.02.01.0011 | b, b               | X | 572  | 2003 | 1.65 | 0.188  | 161 |
| 1OJ4 | 2.07.01.0148 | a+b, a+b           | A | 277  | 2003 | 2.01 | 0.1655 | 300 |
| 1ONR | 2.02.01.0002 | a/b                | A | 316  | 1996 | 1.87 | 0.201  | 300 |
| 1OPM | 1.14.17.0003 | b, b               | A | 310  | 1999 | 2.1  | 0.2    | 275 |
| 1OXA | 1.00.00.0000 | a                  | A | 403  | 1995 | 2.1  | 0.196  | 300 |
| 1OYG | 2.04.01.0010 | b                  | A | 440  | 2003 | 1.5  | 0.165  | 114 |
| 1P1X | 4.01.02.0004 | a/b                | A | 250  | 2003 | 0.99 | 0.143  | 300 |
| 1P3D | 6.03.02.0008 | a/b, a/b, a/b      | A | 449  | 2003 | 1.7  | 0.168  | 300 |
| 1P5D | 5.04.02.0008 | a/b, a/b, a/b, a+b | X | 454  | 2003 | 1.6  | 0.156  | 300 |
| 1PA9 | 3.01.03.0048 | a/b                | A | 279  | 2003 | 2    | 0.226  | 300 |
| 1PII | 4.01.01.0048 | a/b, a/b           | A | 452  | 1991 | 2    | 0.173  | 286 |
| 1PKN | 2.07.01.0040 | b, a/b, a/b        | A | 514  | 1994 | 2.9  | 0.191  | 300 |
| 1PMI | 5.03.01.0008 | b                  | A | 440  | 1996 | 1.7  | 0.184  | 300 |
| 1PP4 | 3.01.01.0000 | a/b                | A | 233  | 2003 | 2.5  | 0.182  | 300 |
| 1PS9 | 1.03.01.0034 | a/b, a/b, a/b      | A | 671  | 2003 | 2.2  | 0.203  | 300 |
| 1PTD | 4.06.01.0013 | a/b                | A | 296  | 1995 | 2.6  | 0.187  | 300 |
| 1PUD | 2.04.02.0029 | a/b                | A | 372  | 1996 | 1.85 | 0.19   | 300 |
| 1PYL | 3.01.04.0008 | a+b                | A | 96   | 2003 | 1.51 | 0.149  | 223 |
| 1Q91 | 3.01.03.0005 | a/b                | A | 194  | 2003 | 1.6  | 0.186  | 300 |
| 1QAM | 2.01.01.0048 | a/b                | A | 235  | 1999 | 2.2  | 0.221  | 300 |
| 1QAZ | 3.05.01.0045 | a                  | A | 351  | 1999 | 1.78 | 0.18   | 300 |
| 1QBA | 3.02.01.0052 | b, b, a/b, a+b     | A | 858  | 1996 | 1.85 | 0.139  | 300 |
| 1QFM | 3.04.21.0026 | b, a/b             | A | 705  | 1999 | 1.4  | 0.19   | 300 |
| 1QGX | 3.01.03.0007 | multi-domain       | A | 354  | 1999 | 1.6  | 0.197  | 300 |
| 1QJE | 1.21.03.0001 | b                  | A | 327  | 1999 | 1.35 | 0.131  | 300 |
| 1QK2 | 3.02.01.0091 | a/b                | A | 363  | 1999 | 2    | 0.189  | 295 |
| 1QV0 | 1.13.12.0005 | a                  | A | 185  | 2003 | 1.1  | 0.134  | 300 |
| 1QWN | 3.02.01.0114 | a, b, a/b          | A | 1014 | 2003 | 1.2  | 0.175  | 300 |
| 1R1J | 3.04.24.0011 | a+b                | A | 696  | 2003 | 2.35 | 0.222  | 300 |
| 1R44 | 3.04.13.0000 | a+b                | A | 202  | 2003 | 2.25 | 0.254  | 300 |
| 1R4Z | 3.01.01.0003 | a/b                | A | 179  | 2003 | 1.8  | 0.177  | 300 |
| 1RBN | 3.01.27.0005 | a+b                | A | 124  | 1994 | 2.1  | 0.166  | 292 |
| 1RDD | 3.01.26.0004 | a/b                | A | 155  | 1993 | 2.8  | 0.19   | 300 |
| 1RU4 | 4.02.02.0002 | b                  | A | 400  | 2003 | 1.6  | 0.167  | 300 |
| 1S3I | 1.05.01.0006 | b, a/b             | A | 307  | 2004 | 2.3  | 0.242  | 300 |
| 1S95 | 3.01.03.0016 | a+b                | A | 324  | 2004 | 1.6  | 0.169  | 300 |
| 1SCA | 3.04.21.0062 | a/b                | A | 274  | 1993 | 2    | 0.156  | 300 |
| 1SLL | 4.02.02.0015 | b, b               | A | 679  | 1997 | 2    | 0.167  | 184 |
| 1SML | 3.05.02.0006 | a+b                | A | 266  | 1998 | 1.7  | 0.18   | 300 |
| 1SNZ | 5.01.03.0003 | b                  | A | 344  | 2004 | 2.2  | 0.172  | 300 |
| 1TAH | 3.01.01.0003 | a/b                | B | 318  | 1993 | 3    | 0.159  | 300 |
| 1TLP | 3.04.24.0027 | a+b                | E | 316  | 1987 | 2.3  | 0.174  | 300 |
| 1U3F | 6.03.03.0002 | a/b                | A | 164  | 2004 | 2.5  | 0.223  | 300 |

|      |              |                        |   |     |      |      |       |     |
|------|--------------|------------------------|---|-----|------|------|-------|-----|
| 1U5U | 4.02.01.0092 | multi-domain           | A | 366 | 2004 | 2    | 0.196 | 300 |
| 1UAS | 3.02.01.0022 | b, a/b                 | A | 362 | 2003 | 1.5  | 0.16  | 300 |
| 1UN1 | 2.04.01.0207 | b                      | A | 267 | 2003 | 2.1  | 0.206 | 300 |
| 1VID | 2.01.01.0006 | a/b                    | A | 213 | 1996 | 2    | 0.194 | 300 |
| 1VLB | 1.02.99.0007 | a, a+b, a+b, a+b       | A | 907 | 2004 | 1.28 | 0.148 | 300 |
| 1VNC | 1.11.01.0010 | a                      | A | 576 | 1995 | 2.1  | 0.2   | 126 |
| 1VQ1 | 2.01.01.0000 | a/b                    | A | 263 | 2004 | 2.8  | 0.208 | 300 |
| 1W0H | 3.01.00.0000 | a/b                    | A | 194 | 2004 | 1.59 | 0.168 | 300 |
| 1XQW | 3.04.11.0005 | na                     | A | 290 | 2004 | 2    | 0.248 | 300 |
| 1Y9M | 3.02.01.0080 | b, b                   | A | 517 | 2004 | 1.89 | 0.165 | 300 |
| 1YON | 1.01.01.0169 | a, a/b                 | A | 292 | 2005 | 1.95 | 0.166 | 300 |
| 1YSC | 3.04.16.0005 | a/b                    | A | 421 | 1994 | 2.8  | 0.162 | 300 |
| 1ZE1 | 4.02.01.0070 | b, a+b                 | A | 308 | 2005 | 2.9  | 0.235 | 300 |
| 1ZIO | 2.07.04.0003 | a/b, Small<br>proteins | A | 217 | 1996 | 1.96 | 0.161 | 300 |
| 206L | 3.02.01.0017 | a+b                    | A | 162 | 1996 | 1.75 | 0.17  | 300 |
| 2A0N | 4.01.03.0000 | a/b                    | A | 251 | 2005 | 1.64 | 0.167 | 300 |
| 2ABK | 4.02.99.0018 | a                      | A | 211 | 1995 | 1.85 | 0.185 | 300 |
| 2ACY | 3.06.01.0007 | a+b                    | A | 98  | 1996 | 1.8  | 0.179 | 300 |
| 2AYH | 3.02.01.0073 | b                      | A | 214 | 1995 | 1.6  | 0.143 | 300 |
| 2CPO | 1.11.01.0010 | a, a                   | A | 298 | 1996 | 2.1  | 0.186 | 158 |
| 2CPU | 3.02.01.0001 | b, a/b                 | A | 495 | 1999 | 2    | 0.167 | 300 |
| 2DLN | 6.03.02.0004 | a/b, a+b               | A | 306 | 1994 | 2.3  | 0.172 | 300 |
| 2EBN | 3.02.01.0096 | a/b                    | A | 285 | 1994 | 2    | 0.158 | 300 |
| 2ENG | 3.02.01.0004 | b                      | A | 205 | 1995 | 1.5  | 0.105 | 120 |
| 2F61 | 3.02.01.0045 | b, a/b                 | A | 497 | 2005 | 2.5  | 0.196 | 300 |
| 2F9R | 3.01.04.0041 | na                     | A | 285 | 2005 | 1.85 | 0.187 | 174 |
| 2NLR | 3.02.01.0004 | b                      | A | 222 | 1998 | 1.2  | 0.112 | 259 |
| 2NMT | 2.03.01.0097 | a+b, a+b               | A | 422 | 1998 | 2.9  | 0.228 | 181 |
| 2PEC | 4.02.02.0002 | b                      | A | 352 | 1994 | 2.2  | 0.18  | 300 |
| 2PIA | 1.00.00.0000 | b, a/b, a+b            | A | 321 | 1993 | 2    | 0.186 | 300 |
| 2PTH | 3.01.01.0029 | a/b                    | A | 193 | 1997 | 1.2  | 0.196 | 300 |
| 2SQC | 5.04.99.0017 | a, a                   | A | 623 | 1998 | 2    | 0.153 | 300 |
| 2THI | 2.05.01.0002 | a/b                    | A | 362 | 1998 | 2.5  | 0.195 | 300 |
| 2TPS | 2.05.01.0003 | a/b                    | A | 226 | 1999 | 1.25 | 0.181 | 300 |
| 5EAT | 4.02.03.0009 | a, a                   | A | 532 | 1997 | 2.8  | 0.24  | 300 |
| 7ATJ | 1.11.01.0007 | a                      | A | 305 | 1999 | 1.47 | 0.16  | 300 |

<sup>1</sup> Number of sites in each protein sequence

<sup>2</sup> Number of sequence in the MSA profile of each protein

TABLE S2

Comparison between sequence variability measures using RSA as reference

| ref.             | x1   | x2   | $\Delta^1$ | T <sup>2</sup> | Paired.T <sup>3</sup> | % <sup>4</sup> | Binomial <sup>5</sup> | d <sup>6</sup> | W <sup>7</sup> | Paired.W <sup>8</sup> |
|------------------|------|------|------------|----------------|-----------------------|----------------|-----------------------|----------------|----------------|-----------------------|
| RSA <sup>T</sup> | CS   | ET   | 0.006      | 1.3            | 0.096628              | 51.9           | 0.316985              | 0.002          | 12249          | 0.282008              |
|                  | CS   | KBSP | 0.050      | 8.3            | 5.31E-15              | 72.7           | 9.26E-12              | 0.059          | 18573          | 4.53E-14              |
|                  | CS   | VTSP | 0.051      | 8.4            | 2.44E-15              | 73.6           | 1.23E-12              | 0.060          | 18697          | 1.62E-14              |
|                  | CS   | EN   | 0.194      | 18.1           | 2.25E-45              | 95.4           | 4.92E-49              | 0.186          | 23230          | 2.97E-36              |
|                  | ET   | KBSP | 0.044      | 8.1            | 1.66E-14              | 74.1           | 4.32E-13              | 0.057          | 18862          | 3.98E-15              |
|                  | ET   | VTSP | 0.045      | 8.4            | 3.60E-15              | 74.1           | 4.32E-13              | 0.058          | 18965          | 1.64E-15              |
|                  | ET   | EN   | 0.188      | 17.3           | 7.33E-43              | 94.0           | 2.51E-45              | 0.184          | 23118          | 1.37E-35              |
|                  | KBSP | VTSP | 0.001      | 2.0            | 0.021100              | 50.9           | 0.419158              | 0.001          | 12196          | 0.301792              |
|                  | KBSP | EN   | 0.144      | 12.8           | 1.47E-28              | 84.7           | 1.10E-26              | 0.127          | 21986          | 3.02E-29              |
|                  | VTSP | EN   | 0.143      | 12.6           | 5.78E-28              | 84.7           | 1.10E-26              | 0.127          | 21862          | 1.36E-28              |

<sup>1</sup> Difference between the mean correlations of ref with x1 and x2<sup>2</sup> T-value derived by T test with paired variables<sup>3</sup> P-value derived by T test with paired variables for x1 > x2<sup>4</sup> The proportion of cases for which x1 > x2<sup>5</sup> P-value derived by Binomial test for x1 > x2<sup>6</sup> Difference between the median correlations of ref with x1 and x2<sup>7</sup> W-value derived by Wilcoxon matched-paired signed-rank test<sup>8</sup> P-value derived by Wilcoxon matched-paired signed-rank test for x1 > x2

**Table S3****Comparison between sequence variability measures using WCN as reference**

| ref. | x1   | x2   | $\Delta^1$ | T <sup>2</sup> | Paired.T <sup>3</sup> | % <sup>4</sup> | Binomial <sup>5</sup> | d <sup>6</sup> | W <sup>7</sup> | Paired.W <sup>8</sup> |
|------|------|------|------------|----------------|-----------------------|----------------|-----------------------|----------------|----------------|-----------------------|
| WCN  | CS   | ET   | 0.000      | 0.0            | 0.514733              | 42.6           | 0.987740              | -0.001         | 10306          | 0.937732              |
|      | CS   | KBSP | 0.041      | 6.5            | 3.53E-10              | 68.5           | 2.72E-08              | 0.052          | 17360          | 4.26E-10              |
|      | CS   | VTSP | 0.041      | 6.4            | 4.25E-10              | 69.4           | 5.37E-09              | 0.053          | 17338          | 4.95E-10              |
|      | CS   | EN   | 0.196      | 15.9           | 1.63E-38              | 93.5           | 3.66E-44              | 0.175          | 22976          | 9.29E-35              |
|      | ET   | KBSP | 0.041      | 6.4            | 3.84E-10              | 72.7           | 9.26E-12              | 0.053          | 17931          | 7.11E-12              |
|      | ET   | VTSP | 0.042      | 6.5            | 3.31E-10              | 72.2           | 2.46E-11              | 0.054          | 17858          | 1.22E-11              |
|      | ET   | EN   | 0.196      | 15.5           | 2.45E-37              | 93.1           | 4.96E-43              | 0.176          | 22799          | 9.77E-34              |
|      | KBSP | VTSP | 0.000      | 0.1            | 0.461592              | 40.3           | 0.998329              | 0.001          | 9805           | 0.981275              |
|      | KBSP | EN   | 0.154      | 11.9           | 1.04E-25              | 86.1           | 5.56E-29              | 0.124          | 21810          | 2.55E-28              |
|      | VTSP | EN   | 0.154      | 11.8           | 1.52E-25              | 83.3           | 1.59E-24              | 0.123          | 21715          | 7.96E-28              |

<sup>1</sup> Difference between the mean correlations of ref with x1 and x2<sup>2</sup> T-value derived by T test with paired variables<sup>3</sup> P-value derived by T test with paired variables for x1 > x2<sup>4</sup> The proportion of cases for which x1 > x2<sup>5</sup> P-value derived by Binomial test for x1 > x2<sup>6</sup> Difference between the median correlations of ref with x1 and x2<sup>7</sup> W-value derived by Wilcoxon matched-paired signed-rank test<sup>8</sup> P-value derived by Wilcoxon matched-paired signed-rank test for x1 > x2

TABLE S4

Comparison between SA profiles using sequence variability measures as reference

| ref. | x1               | x2               | $\Delta^1$ | T <sup>2</sup> | Paired.T <sup>3</sup> | % <sup>4</sup> | Binomial <sup>5</sup> | d <sup>6</sup> | W <sup>7</sup> | Paired.W <sup>8</sup> |
|------|------------------|------------------|------------|----------------|-----------------------|----------------|-----------------------|----------------|----------------|-----------------------|
| CS   | RSA <sup>T</sup> | RSA <sup>M</sup> | 0.001      | 3.5            | 3.34E-04              | 63.9           | 2.69E-05              | 0.006          | 15267          | 5.70E-05              |
|      | RSA <sup>T</sup> | RSA <sup>R</sup> | 0.001      | 3.4            | 4.21E-04              | 65.3           | 4.19E-06              | 0.005          | 15111          | 1.13E-04              |
|      | RSA <sup>T</sup> | ASA              | 0.008      | 4.2            | 1.83E-05              | 60.2           | 1.67E-03              | 0.009          | 15375          | 3.50E-05              |
|      | RSA <sup>M</sup> | RSA <sup>R</sup> | 0.000      | 0.1            | 0.470690              | 47.2           | 0.811776              | -0.001         | 10876          | 0.820210              |
|      | RSA <sup>M</sup> | ASA              | 0.007      | 3.3            | 5.73E-04              | 60.2           | 1.67E-03              | 0.002          | 14615          | 8.17E-04              |
|      | RSA <sup>R</sup> | ASA              | 0.007      | 3.3            | 5.69E-04              | 59.3           | 3.91E-03              | 0.004          | 14688          | 6.21E-04              |
| ET   | RSA <sup>T</sup> | RSA <sup>M</sup> | 0.001      | 3.5            | 2.63E-04              | 61.1           | 6.65E-04              | 0.000          | 14946          | 2.24E-04              |
|      | RSA <sup>T</sup> | RSA <sup>R</sup> | 0.001      | 3.8            | 1.06E-04              | 60.2           | 1.67E-03              | 0.002          | 14949          | 2.22E-04              |
|      | RSA <sup>T</sup> | ASA              | 0.011      | 6.0            | 4.85E-09              | 65.3           | 4.19E-06              | 0.014          | 17033          | 3.75E-09              |
|      | RSA <sup>M</sup> | RSA <sup>R</sup> | 0.000      | 1.0            | 0.162618              | 48.6           | 0.683015              | 0.002          | 12013          | 0.374389              |
|      | RSA <sup>M</sup> | ASA              | 0.009      | 4.9            | 8.73E-07              | 62.0           | 2.46E-04              | 0.014          | 16322          | 2.78E-07              |
|      | RSA <sup>R</sup> | ASA              | 0.009      | 4.8            | 1.28E-06              | 62.5           | 1.45E-04              | 0.013          | 16251          | 4.14E-07              |
| KBSP | RSA <sup>T</sup> | RSA <sup>M</sup> | 0.003      | 9.6            | 1.25E-18              | 77.3           | 1.46E-16              | 0.003          | 19443          | 2.23E-17              |
|      | RSA <sup>T</sup> | RSA <sup>R</sup> | 0.003      | 9.5            | 2.03E-18              | 75.9           | 5.21E-15              | 0.003          | 19497          | 1.35E-17              |
|      | RSA <sup>T</sup> | ASA              | 0.012      | 6.4            | 4.24E-10              | 68.1           | 5.94E-08              | 0.008          | 17530          | 1.31E-10              |
|      | RSA <sup>M</sup> | RSA <sup>R</sup> | 0.000      | -0.3           | 0.632773              | 45.4           | 0.923561              | 0.000          | 11168          | 0.725292              |
|      | RSA <sup>M</sup> | ASA              | 0.009      | 4.5            | 6.13E-06              | 64.4           | 1.48E-05              | 0.005          | 16211          | 5.16E-07              |
|      | RSA <sup>R</sup> | ASA              | 0.009      | 4.5            | 4.91E-06              | 63.0           | 8.44E-05              | 0.005          | 16214          | 5.08E-07              |
| VTSP | RSA <sup>T</sup> | RSA <sup>M</sup> | 0.003      | 9.8            | 3.12E-19              | 77.3           | 1.46E-16              | 0.003          | 19549          | 8.32E-18              |
|      | RSA <sup>T</sup> | RSA <sup>R</sup> | 0.003      | 9.7            | 5.49E-19              | 76.9           | 4.94E-16              | 0.004          | 19647          | 3.30E-18              |
|      | RSA <sup>T</sup> | ASA              | 0.012      | 6.4            | 5.84E-10              | 67.1           | 2.66E-07              | 0.008          | 17500          | 1.62E-10              |
|      | RSA <sup>M</sup> | RSA <sup>R</sup> | 0.000      | -0.4           | 0.641680              | 45.4           | 0.923561              | 0.000          | 11122          | 0.741720              |
|      | RSA <sup>M</sup> | ASA              | 0.008      | 4.4            | 8.54E-06              | 63.9           | 2.69E-05              | 0.005          | 16149          | 7.25E-07              |
|      | RSA <sup>R</sup> | ASA              | 0.008      | 4.5            | 6.84E-06              | 62.5           | 1.45E-04              | 0.004          | 16173          | 6.36E-07              |
| EN   | ASA              | RSA <sup>T</sup> | 0.006      | 3.1            | 1.01E-03              | 62.5           | 1.45E-04              | 0.011          | 15025          | 1.62E-04              |
|      | ASA              | RSA <sup>M</sup> | 0.007      | 3.5            | 3.09E-04              | 63.4           | 4.81E-05              | 0.015          | 15416          | 2.90E-05              |
|      | ASA              | RSA <sup>R</sup> | 0.007      | 3.5            | 2.44E-04              | 64.4           | 1.48E-05              | 0.014          | 15456          | 2.41E-05              |
|      | RSA <sup>T</sup> | RSA <sup>M</sup> | 0.001      | 3.0            | 1.73E-03              | 64.8           | 7.93E-06              | 0.004          | 14982          | 1.93E-04              |
|      | RSA <sup>T</sup> | RSA <sup>R</sup> | 0.001      | 3.3            | 5.31E-04              | 64.8           | 7.93E-06              | 0.003          | 15345          | 4.01E-05              |
|      | RSA <sup>M</sup> | RSA <sup>R</sup> | 0.000      | 1.1            | 0.141269              | 54.2           | 0.123666              | -0.001         | 12503          | 0.196803              |

<sup>1</sup> Difference between the mean correlations of ref with x1 and x2<sup>2</sup> T-value derived by T test with paired variables<sup>3</sup> P-value derived by T test with paired variables for x1 > x2<sup>4</sup> The proportion of cases for which x1 > x2<sup>5</sup> P-value derived by Binomial test for x1 > x2<sup>6</sup> Difference between the median correlations of ref with x1 and x2<sup>7</sup> W-value derived by Wilcoxon matched-paired signed-rank test<sup>8</sup> P-value derived by Wilcoxon matched-paired signed-rank test for x1 > x2



**TABLE S5****Mean Pearson correlations between  $CN_{\text{cut-off}}$  and sequence profiles**

| <b>Profile</b>         | <b>CS</b> | <b>ET</b> | <b>KBSP</b> | <b>VTSP</b> | <b>EN</b> |
|------------------------|-----------|-----------|-------------|-------------|-----------|
| <b>CN<sub>9</sub></b>  | 0.5324    | 0.5277    | 0.4913      | 0.4909      | 0.3617    |
| <b>CN<sub>10</sub></b> | 0.5589    | 0.5513    | 0.5126      | 0.5123      | 0.3847    |
| <b>CN<sub>11</sub></b> | 0.5648    | 0.5565    | 0.5233      | 0.5233      | 0.3846    |
| <b>CN<sub>12</sub></b> | 0.5768    | 0.5695    | 0.5321      | 0.5321      | 0.3959    |
| <b>CN<sub>13</sub></b> | 0.5820    | 0.5765    | 0.5383      | 0.5383      | 0.4004    |
| <b>CN<sub>14</sub></b> | 0.5859    | 0.5818    | 0.5430      | 0.5430      | 0.4054    |
| <b>CN<sub>15</sub></b> | 0.5862    | 0.5832    | 0.5449      | 0.5450      | 0.4073    |
| <b>CN<sub>16</sub></b> | 0.5888    | 0.5867    | 0.5474      | 0.5476      | 0.4113    |
| <b>CN<sub>17</sub></b> | 0.5918    | 0.5905    | 0.5491      | 0.5493      | 0.4155    |
| <b>CN<sub>18</sub></b> | 0.5951    | 0.5945    | 0.5506      | 0.5508      | 0.4198    |
| <b>CN<sub>19</sub></b> | 0.5958    | 0.5956    | 0.5500      | 0.5502      | 0.4217    |
| <b>CN<sub>20</sub></b> | 0.5952    | 0.5954    | 0.5484      | 0.5485      | 0.4223    |
| <b>CN<sub>21</sub></b> | 0.5948    | 0.5953    | 0.5468      | 0.5469      | 0.4215    |
| <b>CN<sub>22</sub></b> | 0.5933    | 0.5942    | 0.5444      | 0.5445      | 0.4195    |
| <b>CN<sub>23</sub></b> | 0.5898    | 0.5914    | 0.5409      | 0.5410      | 0.4157    |
| <b>CN<sub>24</sub></b> | 0.5864    | 0.5884    | 0.5368      | 0.5368      | 0.4116    |
| <b>CN<sub>25</sub></b> | 0.5815    | 0.5838    | 0.5316      | 0.5316      | 0.4056    |
| <b>CN<sub>26</sub></b> | 0.5768    | 0.5793    | 0.5265      | 0.5264      | 0.3999    |
| <b>CN<sub>27</sub></b> | 0.5706    | 0.5735    | 0.5202      | 0.5201      | 0.3927    |
| <b>CN<sub>28</sub></b> | 0.5639    | 0.5672    | 0.5138      | 0.5136      | 0.3848    |
| <b>CN<sub>29</sub></b> | 0.5566    | 0.5601    | 0.5063      | 0.5061      | 0.3766    |
| <b>CN<sub>30</sub></b> | 0.5483    | 0.5520    | 0.4984      | 0.4981      | 0.3675    |

TABLE S6

Comparison between LPD profiles using sequence variability measures as reference

| ref. | x1  | x2  | $\Delta^1$ | T <sup>2</sup> | Paired.T <sup>3</sup> | % <sup>4</sup> | Binomial <sup>5</sup> | d <sup>6</sup> | W <sup>7</sup> | Paired.W <sup>8</sup> |
|------|-----|-----|------------|----------------|-----------------------|----------------|-----------------------|----------------|----------------|-----------------------|
| CS   |     |     | 0.013      | 5.8            | 1.51E-08              | 67.1           | 2.66E-07              | 0.015          | 16954          | 6.23E-09              |
| ET   |     |     | 0.013      | 5.7            | 2.02E-08              | 64.4           | 1.48E-05              | 0.014          | 16730          | 2.52E-08              |
| KBSP | WCN | CN* | 0.017      | 8.0            | 4.52E-14              | 70.4           | 9.73E-10              | 0.023          | 18269          | 5.27E-13              |
| VTSP |     |     | 0.016      | 7.9            | 9.44E-14              | 70.8           | 4.01E-10              | 0.018          | 18197          | 9.27E-13              |
| EN   |     |     | -0.009     | -3.5           | 0.999683              | 38.4           | 0.999754              | 0.001          | 8386           | 0.999855              |

<sup>1</sup> Difference between the mean correlations of ref with x1 and x2<sup>2</sup> T-value derived by T test with paired variables<sup>3</sup> P-value derived by T test with paired variables for x1 > x2<sup>4</sup> The proportion of cases for which x1 > x2<sup>5</sup> P-value derived by Binomial test for x1 > x2<sup>6</sup> Difference between the median correlations of ref with x1 and x2<sup>7</sup> W-value derived by Wilcoxon matched-paired signed-rank test<sup>8</sup> P-value derived by Wilcoxon matched-paired signed-rank test for x1 > x2

TABLE S7

Comparison between WCN and RSA<sup>T</sup> using sequence variability measures as reference

| ref. | x1  | x2               | $\Delta^1$ | T <sup>2</sup> | Paired.T <sup>3</sup> | % <sup>4</sup> | Binomial <sup>5</sup> | d <sup>6</sup> | W <sup>7</sup> | Paired.W <sup>8</sup> |
|------|-----|------------------|------------|----------------|-----------------------|----------------|-----------------------|----------------|----------------|-----------------------|
| CS   |     |                  | 0.049      | 11.9           | 9.91E-26              | 79.2           | 8.65E-19              | 0.057          | 20388          | 2.10E-21              |
| ET   |     |                  | 0.056      | 12.3           | 4.45E-27              | 79.6           | 2.24E-19              | 0.059          | 20606          | 2.13E-22              |
| KBSP | WCN | RSA <sup>T</sup> | 0.059      | 12.4           | 2.03E-27              | 81.9           | 1.70E-22              | 0.064          | 20719          | 6.37E-23              |
| VTSP |     |                  | 0.060      | 12.6           | 4.56E-28              | 82.9           | 7.78E-24              | 0.063          | 20805          | 2.52E-23              |
| EN   |     |                  | 0.048      | 10.3           | 1.07E-20              | 77.3           | 1.46E-16              | 0.067          | 19760          | 1.12E-18              |

<sup>1</sup> Difference between the mean correlations of ref with x1 and x2<sup>2</sup> T-value derived by T test with paired variables<sup>3</sup> P-value derived by T test with paired variables for x1 > x2<sup>4</sup> The proportion of cases for which x1 > x2<sup>5</sup> P-value derived by Binomial test for x1 > x2<sup>6</sup> Difference between the median correlations of ref with x1 and x2<sup>7</sup> W-value derived by Wilcoxon matched-paired signed-rank test<sup>8</sup> P-value derived by Wilcoxon matched-paired signed-rank test for x1 > x2

**FIGURE S1**

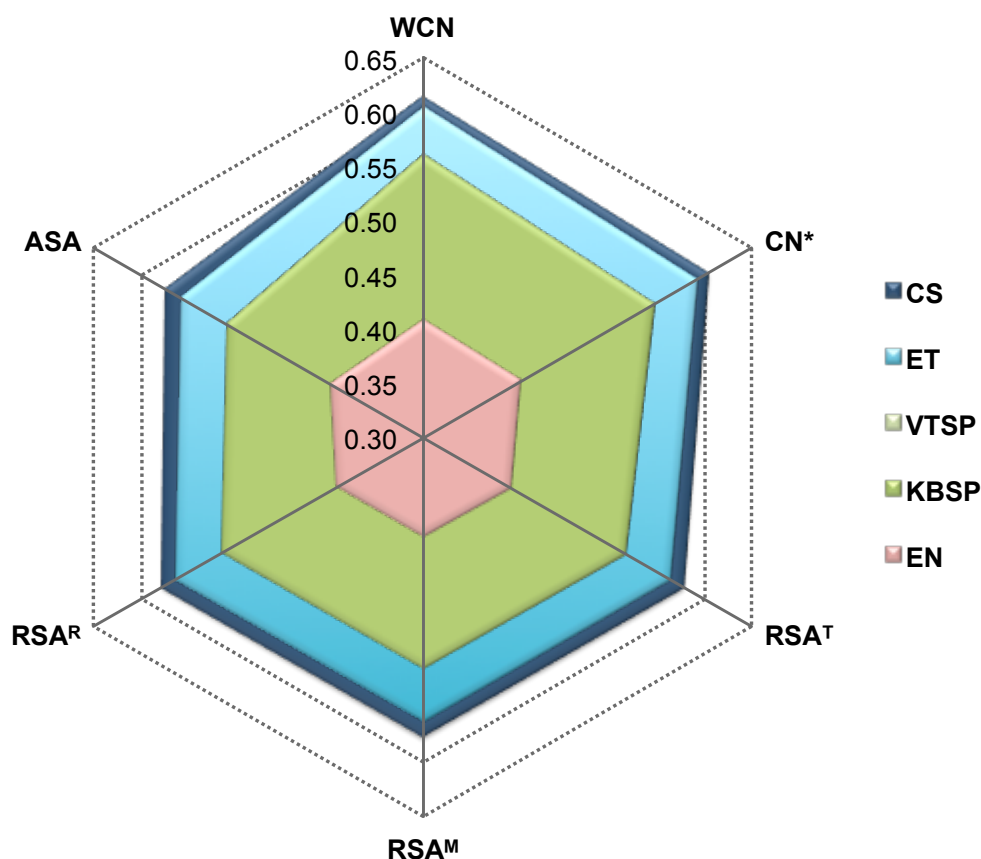

**Figure S1:** Comparison of sequence variability profiles by their average Spearman's correlation coefficients with different structural profiles. The sequence variability scores (listed in the figure legend) are: ConSurf rate of evolution (CS), Evolutionary Trace score (ET), Karlin & Brocchieri Sum-of-Pairs score (KBSP), Valdar & Thornton Sum-of-Pairs score (VTSP), and Entropy (EN). The structural properties (the apices of the hexagon) are: Weighted Contact Number (WCN), Contact Number (CN), Relative Solvent Accessibility (RSA), and Absolute Solvent Accessibility (ASA). The asterisk mark on CN means that the cut-off radius was chosen to maximize each CN-sequence average correlation. The cut-off radii for CS, ET, KBSP, VTSP and EN are 19Å, 19Å, 18Å, 18Å and 20Å, respectively. Superscript letters distinguish RSA profiles obtained using different methods.

**FIGURE S2**

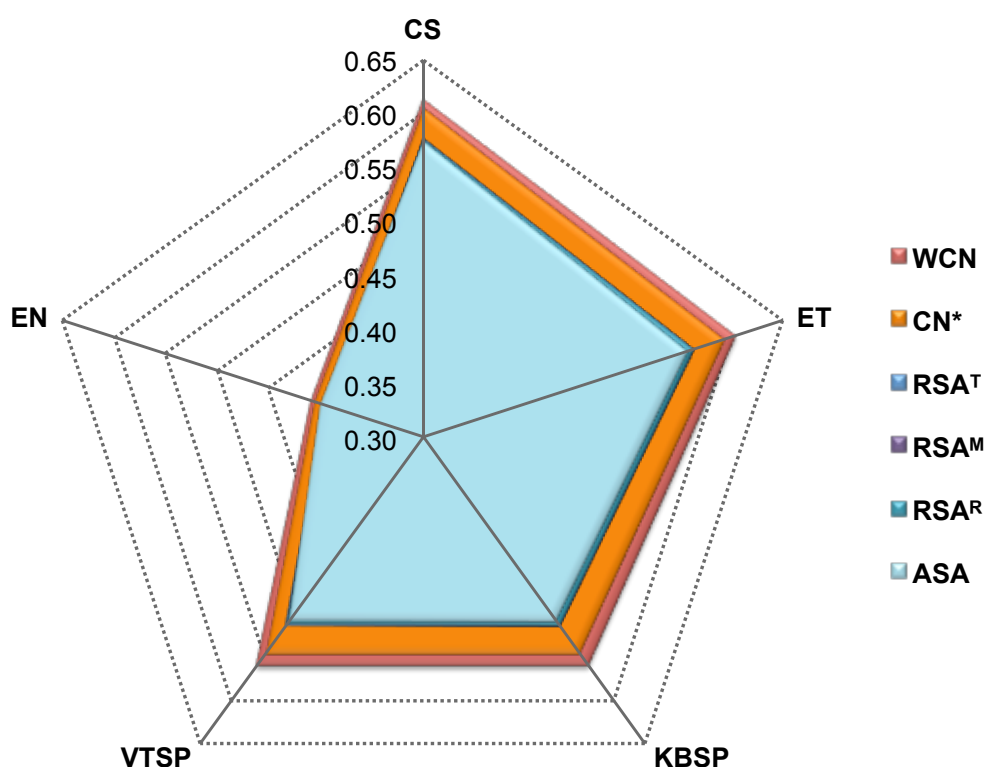

**Figure S2:** Comparison of structural profiles by their average Spearman's correlation coefficients with different sequence variability profiles. The sequence variability measures (the axes of the pentagon) are: ConSurf rate of evolution (CS), Evolutionary Trace score (ET), Karlin & Brocchieri Sum-of-Pairs score (KBSP), Valdar & Thornton Sum-of-Pairs score (VTSP), and Entropy (EN). The structural properties (listed in the figure legend) are: Weighted Contact Number (WCN), Contact Number (CN), Relative Solvent Accessibility (RSA), and Absolute Solvent Accessibility (ASA). The asterisk mark on CN means that the cut-off radius was chosen to maximize each CN-sequence average correlation. The cut-off radii for CS, ET, KBSP, VTSP and EN are 19Å, 19Å, 18Å, 18Å and 20Å, respectively. Superscript letters distinguish RSA profiles obtained using different methods.

**FIGURE S3**

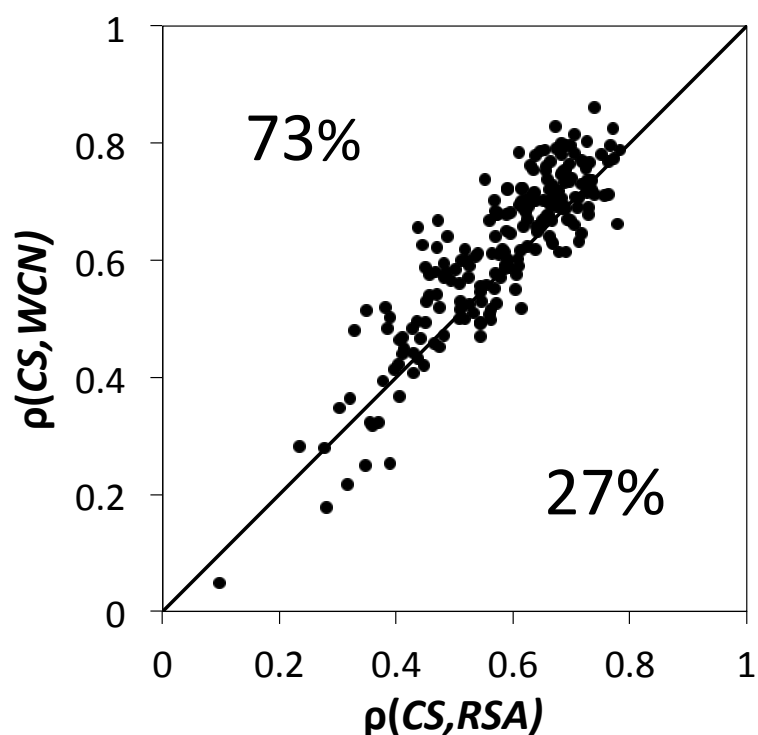

**Figure S3:** Local Packing Density vs. Solvent Accessibility as determinants of site-specific evolutionary rates with Spearman's correlation coefficient. Points above (below) the diagonal are proteins for which WCN ( $RSA^T$ ) correlates better than  $RSA^T$  (WCN) with the site-specific rates of amino acid substitution as estimated using the phylogenetic-based approach ConSurf (CS). The percentages of points above and below the diagonals are shown.

**TABLE S8****Mean structure-sequence Spearman's correlations**

| Property   | Profile          | <i>CS</i> | <i>ET</i> | <i>KBSP</i> | <i>VTSP</i> | <i>EN</i> |
|------------|------------------|-----------|-----------|-------------|-------------|-----------|
| <i>LPD</i> | WCN              | 0.614     | 0.605     | 0.561       | 0.561       | 0.408     |
|            | CN <sup>*</sup>  | 0.604     | 0.593     | 0.547       | 0.547       | 0.405     |
| <i>SA</i>  | RSA <sup>T</sup> | 0.577     | 0.564     | 0.516       | 0.515       | 0.394     |
|            | RSA <sup>M</sup> | 0.576     | 0.563     | 0.514       | 0.513       | 0.393     |
|            | RSA <sup>R</sup> | 0.576     | 0.563     | 0.514       | 0.513       | 0.393     |
|            | ASA              | 0.573     | 0.558     | 0.509       | 0.508       | 0.399     |

\*For each sequence variability profile, the cut-off distance of CN was chosen to maximize the CN-sequence average correlation coefficients. The cut-off radii for CS, ET, KBSP, VTSP and EN are 19Å, 19Å, 18Å, 18Å and 20Å, respectively. Values are the structure-sequence Pearson correlation coefficients averaged over all proteins of the dataset.

TABLE S9

Mean Spearman's correlations between sequence variability measures using RSA as reference

| ref.             | x1   | x2   | $\Delta^1$ | T <sup>2</sup> | Paired.T <sup>3</sup> | % <sup>4</sup> | Binomial <sup>5</sup> | d <sup>6</sup> | W <sup>7</sup> | Paired.W <sup>8</sup> |
|------------------|------|------|------------|----------------|-----------------------|----------------|-----------------------|----------------|----------------|-----------------------|
| RSA <sup>T</sup> | CS   | ET   | 0.013      | 3.1            | 1.26E-03              | 55.6           | 0.058695              | 0.020          | 14061          | 5.43E-03              |
|                  | CS   | KBSP | 0.061      | 11.3           | 8.20E-24              | 78.2           | 1.19E-17              | 0.070          | 20326          | 3.98E-21              |
|                  | CS   | VTSP | 0.062      | 11.3           | 5.87E-24              | 77.8           | 4.22E-17              | 0.072          | 20340          | 3.45E-21              |
|                  | CS   | EN   | 0.183      | 18.4           | 2.04E-46              | 95.8           | 2.36E-50              | 0.186          | 23297          | 1.18E-36              |
|                  | ET   | KBSP | 0.048      | 8.9            | 9.43E-17              | 74.5           | 1.49E-13              | 0.051          | 19372          | 4.30E-17              |
|                  | ET   | VTSP | 0.049      | 9.1            | 2.61E-17              | 75.0           | 4.98E-14              | 0.052          | 19454          | 2.02E-17              |
|                  | ET   | EN   | 0.170      | 17.3           | 8.89E-43              | 92.6           | 6.26E-42              | 0.166          | 23150          | 8.86E-36              |
|                  | KBSP | VTSP | 0.001      | 2.6            | 5.11E-03              | 51.4           | 0.366894              | 0.001          | 12700          | 0.142913              |
|                  | KBSP | EN   | 0.122      | 12.0           | 3.85E-26              | 83.3           | 1.59E-24              | 0.116          | 21793          | 3.13E-28              |
|                  | VTSP | EN   | 0.121      | 11.9           | 1.42E-25              | 82.9           | 7.78E-24              | 0.114          | 21670          | 1.36E-27              |

<sup>1</sup> Difference between the mean correlations of ref with x1 and x2<sup>2</sup> T-value derived by T test with paired variables<sup>3</sup> P-value derived by T test with paired variables for x1 > x2<sup>4</sup> The proportion of cases for which x1 > x2<sup>5</sup> P-value derived by Binomial test for x1 > x2<sup>6</sup> Difference between the median correlations of ref with x1 and x2<sup>7</sup> W-value derived by Wilcoxon matched-paired signed-rank test<sup>8</sup> P-value derived by Wilcoxon matched-paired signed-rank test for x1 > x2



**Table S10****Mean Spearman's correlations between sequence variability measures using WCN as reference**

| ref. | x1   | x2   | $\Delta^1$ | T <sup>2</sup> | Paired.T <sup>3</sup> | % <sup>4</sup> | Binomial <sup>5</sup> | d <sup>6</sup> | W <sup>7</sup> | Paired.W <sup>8</sup> |
|------|------|------|------------|----------------|-----------------------|----------------|-----------------------|----------------|----------------|-----------------------|
| WCN  | CS   | ET   | 0.009      | 1.9            | 0.026554              | 46.3           | 0.876334              | 0.015          | 12376          | 0.237307              |
|      | CS   | KBSP | 0.053      | 8.4            | 2.25E-15              | 70.8           | 4.01E-10              | 0.067          | 18553          | 5.34E-14              |
|      | CS   | VTSP | 0.054      | 8.4            | 2.31E-15              | 71.8           | 6.37E-11              | 0.068          | 18538          | 6.05E-14              |
|      | CS   | EN   | 0.206      | 18.1           | 2.17E-45              | 95.8           | 2.36E-50              | 0.207          | 23238          | 2.66E-36              |
|      | ET   | KBSP | 0.044      | 6.6            | 1.60E-10              | 67.1           | 2.66E-07              | 0.052          | 17814          | 1.70E-11              |
|      | ET   | VTSP | 0.045      | 6.7            | 1.08E-10              | 66.7           | 5.46E-07              | 0.053          | 17806          | 1.80E-11              |
|      | ET   | EN   | 0.197      | 17.0           | 4.24E-42              | 94.4           | 1.59E-46              | 0.192          | 23013          | 5.65E-35              |
|      | KBSP | VTSP | 0.000      | 1.0            | 0.152483              | 44.9           | 0.941305              | 0.002          | 10906          | 0.811529              |
|      | KBSP | EN   | 0.153      | 12.7           | 4.17E-28              | 86.6           | 8.86E-30              | 0.140          | 22056          | 1.28E-29              |
|      | VTSP | EN   | 0.152      | 12.6           | 7.14E-28              | 86.1           | 5.56E-29              | 0.138          | 21993          | 2.77E-29              |

<sup>1</sup> Difference between the mean correlations of ref with x1 and x2<sup>2</sup> T-value derived by T test with paired variables<sup>3</sup> P-value derived by T test with paired variables for x1 > x2<sup>4</sup> The proportion of cases for which x1 > x2<sup>5</sup> P-value derived by Binomial test for x1 > x2<sup>6</sup> Difference between the median correlations of ref with x1 and x2<sup>7</sup> W-value derived by Wilcoxon matched-paired signed-rank test<sup>8</sup> P-value derived by Wilcoxon matched-paired signed-rank test for x1 > x2

TABLE S11

Comparison mean Spearman's correlations between SA profiles using sequence variability measures as reference

| ref. | x1               | x2               | $\Delta^1$ | T <sup>2</sup> | Paired.T <sup>3</sup> | % <sup>4</sup> | Binomial <sup>5</sup> | d <sup>6</sup> | W <sup>7</sup> | Paired.W <sup>8</sup> |
|------|------------------|------------------|------------|----------------|-----------------------|----------------|-----------------------|----------------|----------------|-----------------------|
| CS   | RSA <sup>T</sup> | RSA <sup>M</sup> | 0.001      | 3.1            | 9.63E-04              | 64.4           | 1.48E-05              | 0.004          | 15128          | 1.05E-04              |
|      | RSA <sup>T</sup> | RSA <sup>R</sup> | 0.001      | 3.1            | 9.65E-04              | 60.6           | 1.06E-03              | 0.005          | 14953          | 2.18E-04              |
|      | RSA <sup>T</sup> | ASA              | 0.004      | 2.4            | 9.41E-03              | 59.3           | 3.91E-03              | 0.001          | 14075          | 5.20E-03              |
|      | RSA <sup>M</sup> | RSA <sup>R</sup> | 0.000      | 0.0            | 0.514708              | 46.3           | 0.876334              | 0.001          | 11062          | 0.762357              |
|      | RSA <sup>M</sup> | ASA              | 0.003      | 1.6            | 0.054505              | 56.9           | 0.024111              | -0.003         | 13390          | 0.034558              |
|      | RSA <sup>R</sup> | ASA              | 0.003      | 1.6            | 0.052425              | 55.6           | 0.058695              | -0.003         | 13412          | 0.032768              |
| ET   | RSA <sup>T</sup> | RSA <sup>M</sup> | 0.001      | 1.7            | 0.047994              | 54.2           | 0.123666              | 0.002          | 13329          | 0.039945              |
|      | RSA <sup>T</sup> | RSA <sup>R</sup> | 0.001      | 2.0            | 0.021647              | 55.1           | 0.076439              | 0.003          | 13654          | 0.017657              |
|      | RSA <sup>T</sup> | ASA              | 0.006      | 3.8            | 1.02E-04              | 59.3           | 3.91E-03              | 0.002          | 15266          | 5.72E-05              |
|      | RSA <sup>M</sup> | RSA <sup>R</sup> | 0.000      | 0.9            | 0.175332              | 49.5           | 0.580842              | 0.001          | 12219          | 0.293130              |
|      | RSA <sup>M</sup> | ASA              | 0.005      | 3.2            | 7.10E-04              | 58.8           | 5.82E-03              | 0.000          | 14910          | 2.60E-04              |
|      | RSA <sup>R</sup> | ASA              | 0.005      | 3.2            | 8.96E-04              | 57.9           | 0.012260              | 0.000          | 14799          | 4.04E-04              |
| KBSP | RSA <sup>T</sup> | RSA <sup>M</sup> | 0.002      | 7.7            | 2.96E-13              | 72.7           | 9.26E-12              | 0.002          | 18540          | 5.95E-14              |
|      | RSA <sup>T</sup> | RSA <sup>R</sup> | 0.002      | 7.1            | 9.99E-12              | 69.9           | 2.31E-09              | 0.002          | 17854          | 1.26E-11              |
|      | RSA <sup>T</sup> | ASA              | 0.007      | 4.3            | 1.50E-05              | 65.7           | 2.17E-06              | 0.005          | 15988          | 1.72E-06              |
|      | RSA <sup>M</sup> | RSA <sup>R</sup> | 0.000      | -0.4           | 0.663093              | 46.3           | 0.876334              | 0.000          | 10947          | 0.799254              |
|      | RSA <sup>M</sup> | ASA              | 0.005      | 2.9            | 1.95E-03              | 62.0           | 2.46E-04              | 0.004          | 14806          | 3.93E-04              |
|      | RSA <sup>R</sup> | ASA              | 0.005      | 3.0            | 1.62E-03              | 62.0           | 2.46E-04              | 0.004          | 14775          | 4.44E-04              |
| VTSP | RSA <sup>T</sup> | RSA <sup>M</sup> | 0.002      | 7.8            | 1.43E-13              | 73.6           | 1.23E-12              | 0.002          | 18619          | 3.10E-14              |
|      | RSA <sup>T</sup> | RSA <sup>R</sup> | 0.002      | 7.2            | 4.66E-12              | 69.9           | 2.31E-09              | 0.002          | 17995          | 4.39E-12              |
|      | RSA <sup>T</sup> | ASA              | 0.007      | 4.2            | 1.75E-05              | 65.7           | 2.17E-06              | 0.000          | 15936          | 2.26E-06              |
|      | RSA <sup>M</sup> | RSA <sup>R</sup> | 0.000      | -0.4           | 0.644904              | 46.3           | 0.876334              | 0.000          | 10981          | 0.788720              |
|      | RSA <sup>M</sup> | ASA              | 0.005      | 2.9            | 2.23E-03              | 62.5           | 1.45E-04              | -0.002         | 14769          | 4.55E-04              |
|      | RSA <sup>R</sup> | ASA              | 0.005      | 2.9            | 1.88E-03              | 63.0           | 8.44E-05              | -0.001         | 14741          | 5.07E-04              |
| EN   | ASA              | RSA <sup>T</sup> | 0.005      | 3.4            | 4.64E-04              | 61.6           | 4.08E-04              | 0.012          | 15048          | 1.47E-04              |
|      | ASA              | RSA <sup>M</sup> | 0.006      | 3.5            | 2.42E-04              | 59.7           | 2.58E-03              | 0.011          | 15207          | 7.43E-05              |
|      | ASA              | RSA <sup>R</sup> | 0.006      | 3.6            | 1.90E-04              | 61.1           | 6.65E-04              | 0.010          | 15241          | 6.39E-05              |
|      | RSA <sup>T</sup> | RSA <sup>M</sup> | 0.001      | 2.2            | 0.016007              | 63.4           | 4.81E-05              | -0.001         | 14384          | 1.87E-03              |
|      | RSA <sup>T</sup> | RSA <sup>R</sup> | 0.001      | 2.5            | 7.43E-03              | 60.6           | 1.06E-03              | -0.002         | 14173          | 3.80E-03              |
|      | RSA <sup>M</sup> | RSA <sup>R</sup> | 0.000      | 0.8            | 0.201854              | 51.4           | 0.366894              | -0.001         | 12423          | 0.221808              |

<sup>1</sup> Difference between the mean correlations of ref with x1 and x2

<sup>2</sup> T-value derived by T test with paired variables

<sup>3</sup> P-value derived by T test with paired variables for x1 > x2

<sup>4</sup> The proportion of cases for which x1 > x2

<sup>5</sup> P-value derived by Binomial test for x1 > x2

<sup>6</sup> Difference between the median correlations of ref with x1 and x2

<sup>7</sup> W-value derived by Wilcoxon matched-paired signed-rank test

<sup>8</sup> P-value derived by Wilcoxon matched-paired signed-rank test for x1 > x2

**TABLE S12****Mean Spearman correlations between  $CN_{\text{cut-off}}$  and sequence profiles**

| <b>Profile</b>         | <b>CS</b> | <b>ET</b> | <b>KBSP</b> | <b>VTSP</b> | <b>EN</b> |
|------------------------|-----------|-----------|-------------|-------------|-----------|
| <b>CN<sub>9</sub></b>  | 0.5375    | 0.5271    | 0.4892      | 0.4884      | 0.3651    |
| <b>CN<sub>10</sub></b> | 0.5631    | 0.5497    | 0.5104      | 0.5097      | 0.3856    |
| <b>CN<sub>11</sub></b> | 0.5685    | 0.5549    | 0.5210      | 0.5207      | 0.3844    |
| <b>CN<sub>12</sub></b> | 0.5810    | 0.5677    | 0.5305      | 0.5301      | 0.3931    |
| <b>CN<sub>13</sub></b> | 0.5856    | 0.5737    | 0.5360      | 0.5357      | 0.3950    |
| <b>CN<sub>14</sub></b> | 0.5905    | 0.5794    | 0.5409      | 0.5405      | 0.3973    |
| <b>CN<sub>15</sub></b> | 0.5909    | 0.5802    | 0.5421      | 0.5418      | 0.3962    |
| <b>CN<sub>16</sub></b> | 0.5939    | 0.5837    | 0.5444      | 0.5441      | 0.3976    |
| <b>CN<sub>17</sub></b> | 0.5980    | 0.5879    | 0.5460      | 0.5457      | 0.4002    |
| <b>CN<sub>18</sub></b> | 0.6023    | 0.5922    | 0.5469      | 0.5465      | 0.4033    |
| <b>CN<sub>19</sub></b> | 0.6037    | 0.5934    | 0.5457      | 0.5453      | 0.4045    |
| <b>CN<sub>20</sub></b> | 0.6035    | 0.5931    | 0.5437      | 0.5432      | 0.4048    |
| <b>CN<sub>21</sub></b> | 0.6029    | 0.5925    | 0.5412      | 0.5406      | 0.4039    |
| <b>CN<sub>22</sub></b> | 0.6020    | 0.5916    | 0.5385      | 0.5379      | 0.4025    |
| <b>CN<sub>23</sub></b> | 0.5993    | 0.5893    | 0.5351      | 0.5345      | 0.4000    |
| <b>CN<sub>24</sub></b> | 0.5963    | 0.5866    | 0.5312      | 0.5306      | 0.3976    |
| <b>CN<sub>25</sub></b> | 0.5924    | 0.5832    | 0.5265      | 0.5258      | 0.3939    |
| <b>CN<sub>26</sub></b> | 0.5888    | 0.5799    | 0.5219      | 0.5213      | 0.3910    |
| <b>CN<sub>27</sub></b> | 0.5837    | 0.5751    | 0.5160      | 0.5153      | 0.3863    |
| <b>CN<sub>28</sub></b> | 0.5783    | 0.5703    | 0.5105      | 0.5098      | 0.3822    |
| <b>CN<sub>29</sub></b> | 0.5726    | 0.5648    | 0.5040      | 0.5033      | 0.3779    |
| <b>CN<sub>30</sub></b> | 0.5665    | 0.5589    | 0.4976      | 0.4968      | 0.3734    |

**TABLE S13**

**Comparison mean Spearman's correlations between LPD profiles using sequence variability measures as reference**

| <b>ref.</b> | <b>x1</b> | <b>x2</b> | <b><math>\Delta^1</math></b> | <b>T<sup>2</sup></b> | <b>Paired.T<sup>3</sup></b> | <b>%<sup>4</sup></b> | <b>Binomial<sup>5</sup></b> | <b>d<sup>6</sup></b> | <b>W<sup>7</sup></b> | <b>Paired.W<sup>8</sup></b> |
|-------------|-----------|-----------|------------------------------|----------------------|-----------------------------|----------------------|-----------------------------|----------------------|----------------------|-----------------------------|
| <i>CS</i>   |           |           | 0.011                        | 4.9                  | 1.01E-06                    | 66.2                 | 1.10E-06                    | 0.017                | 16517                | 9.04E-08                    |
| <i>ET</i>   |           |           | 0.012                        | 5.2                  | 2.04E-07                    | 65.3                 | 4.19E-06                    | 0.024                | 16571                | 6.57E-08                    |
| <i>KBSP</i> | WCN       | CN*       | 0.014                        | 6.6                  | 1.86E-10                    | 66.7                 | 5.46E-07                    | 0.015                | 17386                | 3.57E-10                    |
| <i>VTSP</i> |           |           | 0.014                        | 6.6                  | 2.05E-10                    | 67.6                 | 1.27E-07                    | 0.013                | 17401                | 3.22E-10                    |
| <i>EN</i>   |           |           | 0.003                        | 1.4                  | 0.076363                    | 53.2                 | 0.188224                    | 0.007                | 13086                | 0.068498                    |

<sup>1</sup> Difference between the mean correlations of ref with x1 and x2

<sup>2</sup> T-value derived by T test with paired variables

<sup>3</sup> P-value derived by T test with paired variables for x1 > x2

<sup>4</sup> The proportion of cases for which x1 > x2

<sup>5</sup> P-value derived by Binomial test for x1 > x2

<sup>6</sup> Difference between the median correlations of ref with x1 and x2

<sup>7</sup> W-value derived by Wilcoxon matched-paired signed-rank test

<sup>8</sup> P-value derived by Wilcoxon matched-paired signed-rank test for x1 > x2

TABLE S14

Comparison mean Spearman's correlations between WCN and RSA<sup>T</sup> using sequence variability measures as reference

| ref.        | x1  | x2               | $\Delta^1$ | T <sup>2</sup> | Paired.T <sup>3</sup> | % <sup>4</sup> | Binomial <sup>5</sup> | d <sup>6</sup> | W <sup>7</sup> | Paired.W <sup>8</sup> |
|-------------|-----|------------------|------------|----------------|-----------------------|----------------|-----------------------|----------------|----------------|-----------------------|
| <i>CS</i>   |     |                  | 0.037      | 8.4            | 3.67E-15              | 72.7           | 9.26E-12              | 0.045          | 18437          | 1.38E-13              |
| <i>ET</i>   |     |                  | 0.041      | 8.8            | 2.45E-16              | 75.9           | 5.21E-15              | 0.050          | 18860          | 4.05E-15              |
| <i>KBSP</i> | WCN | RSA <sup>T</sup> | 0.045      | 9.5            | 1.58E-18              | 75.0           | 4.98E-14              | 0.049          | 19452          | 2.06E-17              |
| <i>VTSP</i> |     |                  | 0.046      | 9.7            | 6.42E-19              | 75.9           | 5.21E-15              | 0.048          | 19547          | 8.47E-18              |
| <i>EN</i>   |     |                  | 0.014      | 3.2            | 7.77E-04              | 56.5           | 0.032972              | 0.024          | 14495          | 1.27E-03              |

<sup>1</sup> Difference between the mean correlations of ref with x1 and x2

<sup>2</sup> T-value derived by T test with paired variables

<sup>3</sup> P-value derived by T test with paired variables for x1 > x2

<sup>4</sup> The proportion of cases for which x1 > x2

<sup>5</sup> P-value derived by Binomial test for x1 > x2

<sup>6</sup> Difference between the median correlations of ref with x1 and x2

<sup>7</sup> W-value derived by Wilcoxon matched-paired signed-rank test

<sup>8</sup> P-value derived by Wilcoxon matched-paired signed-rank test for x1 > x2

**TABLE S15****Variance partitioning of Spearman's correlations**

| Fit                     | Contribution            | R <sup>2</sup> | %          |
|-------------------------|-------------------------|----------------|------------|
| CS~WCN+RSA <sup>T</sup> | Total                   | 0.420±0.010    | 100        |
|                         | Common                  | 0.332±0.009    | 76.43±1.37 |
|                         | Unique WCN              | 0.069±0.004    | 16.85±1.04 |
|                         | Unique RSA <sup>T</sup> | 0.020±0.002    | 6.72±0.84  |

NOTE: Fit is the bivariate linear fit considered, R<sup>2</sup> is the explained variance averaged over the dataset of 216 enzymes ± its standard deviation, % is the proportion of explained variance accounted for by the given contribution.
